# Supplementary material for: Longitudinal transcriptional changes reveal genes from the natural killer cell-mediated cytotoxicity pathway as critical players underlying COVID-19 progression
Source: eLife journal article supplement (doi:10.7554/elife.94242), 2024-02-02

**A** Day 0 - KEGG graph of Natural Killer cell mediated cytotoxicity pathway

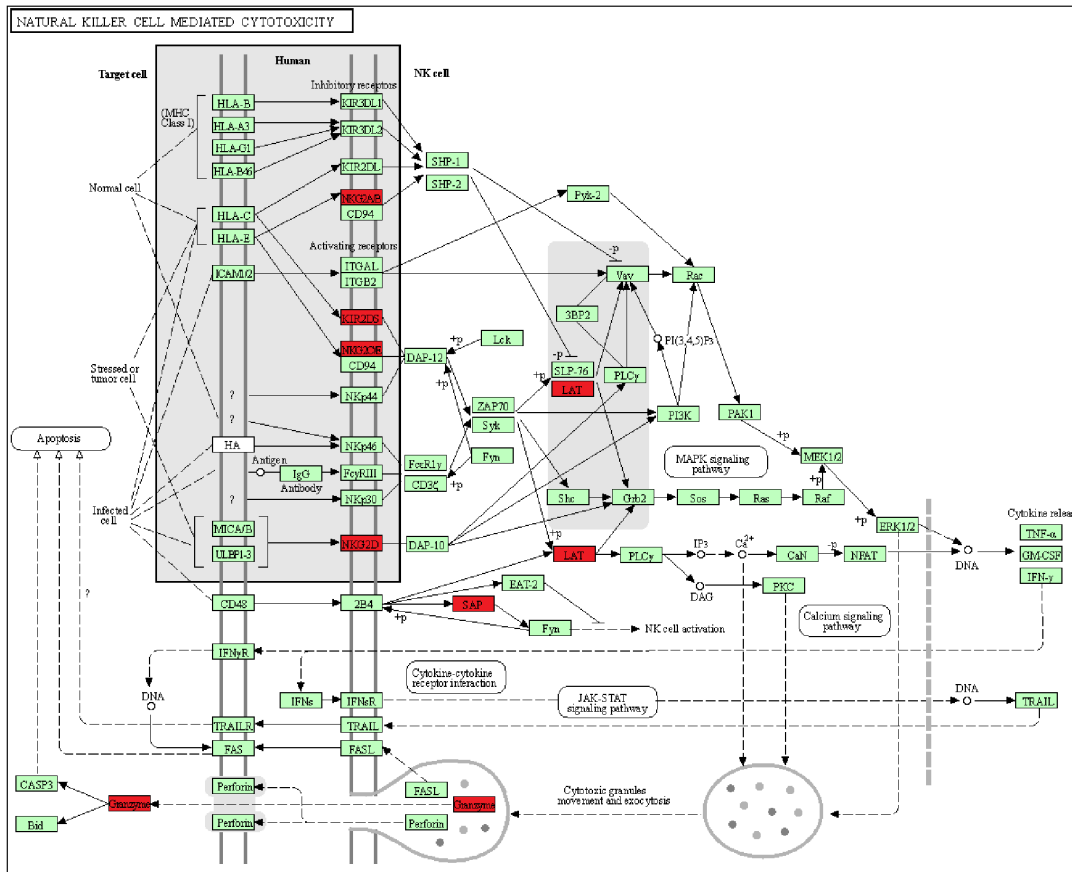

**B** Day 7 - KEGG graph of Natural Killer cell mediated cytotoxicity pathway

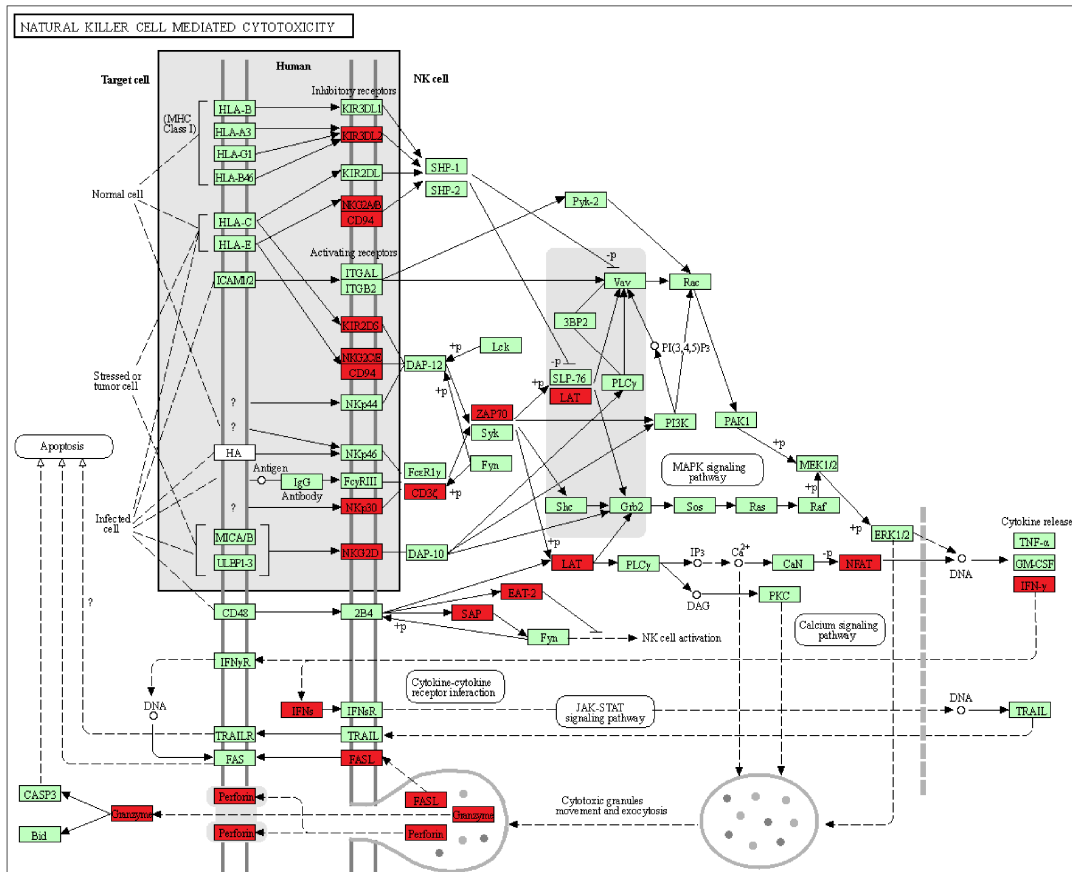

### C Day 0 - KEGG graph of Th1 and Th2 cell differentiation

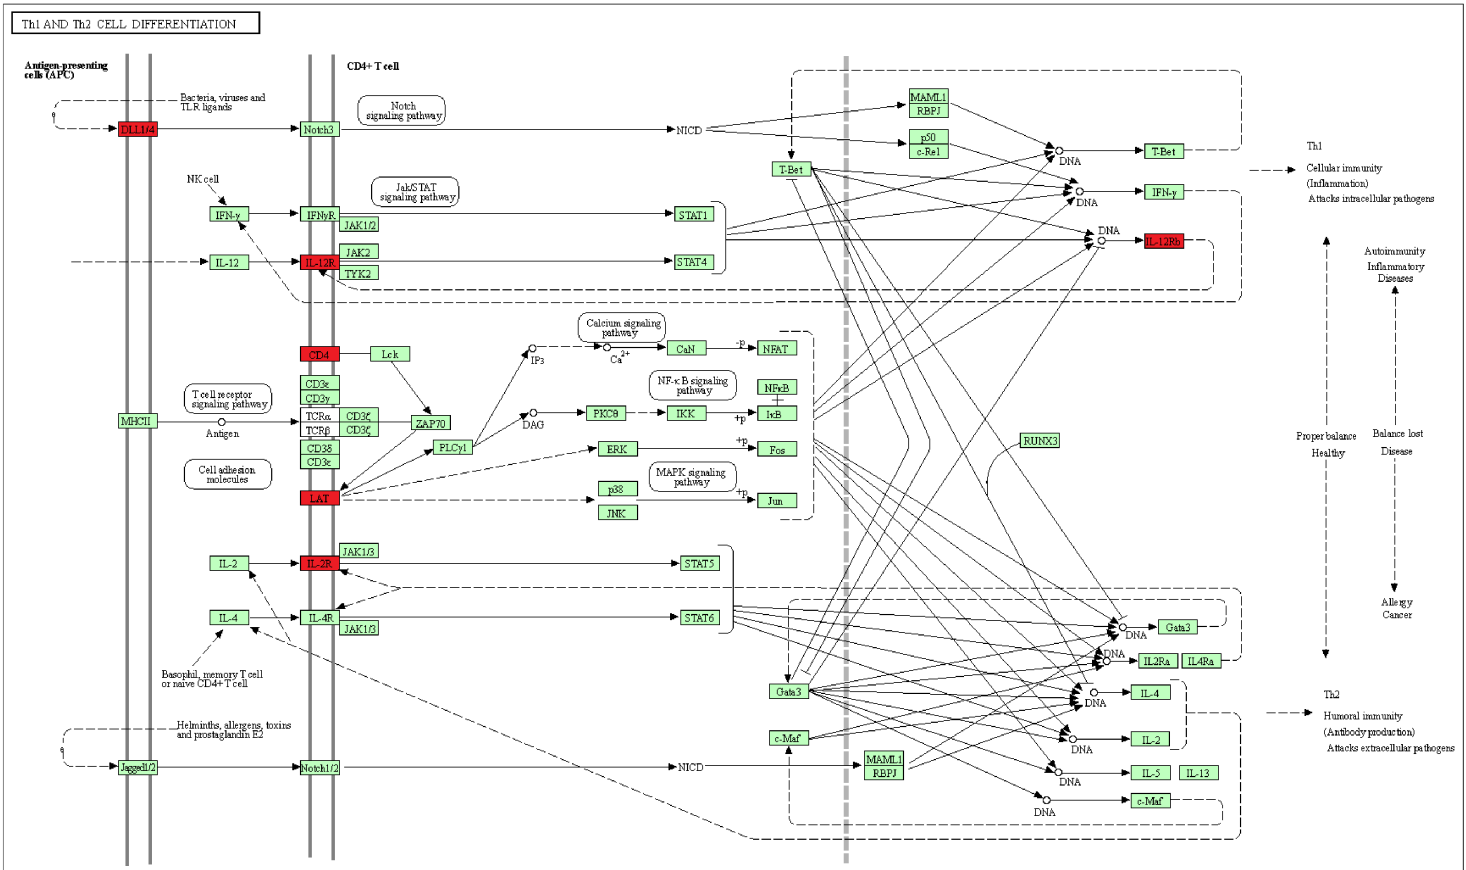

### D Day 7 - KEGG graph of Th1 and Th2 cell differentiation

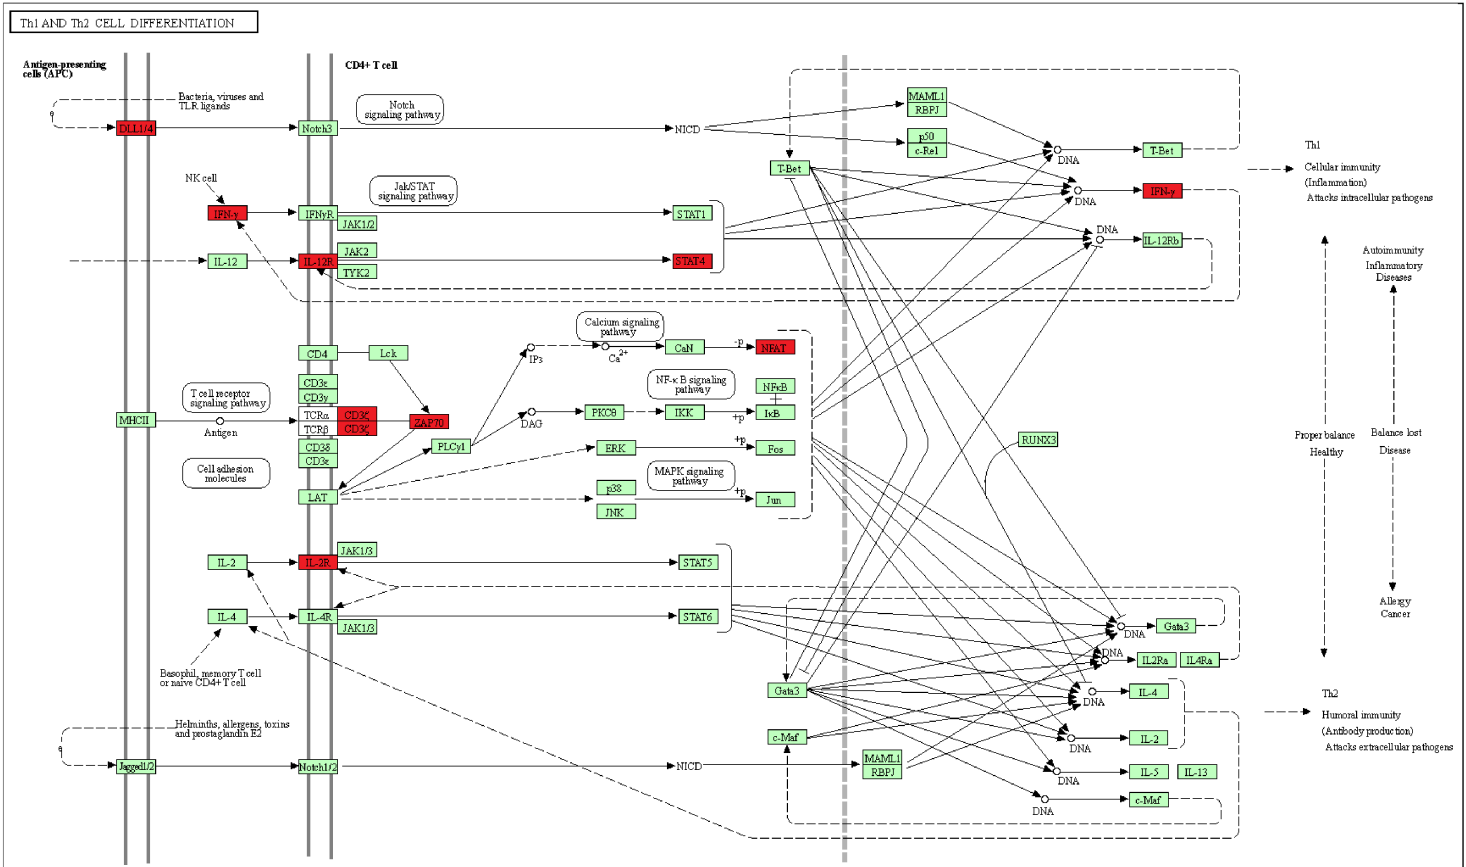

Supplement: fig4-data1 [file elife-94242-fig4-data1-v1.pdf]
